# Supplementary material
Source: Elsevier journal article supplement (https://www.sciencedirect.com/science/article/pii/S0300289622003465)
Supplement: mmc1 [file S0300289622003465:mmc1.pdf]

## Scientific Letter

### Análisis de la exposición y de los efectos sobre la salud respiratoria relacionados con la erupción volcánica de Cumbre Vieja en la Isla de la Palma

#### Analysis of Exposure and Respiratory Health Effects of Volcanic Eruption in the Canary Islands (ASHES). A SEPAR study.

---

**Autores:** Alberto Ruano-Ravina<sup>1,2,3</sup>, Orlando Acosta<sup>4</sup>, David Díaz Pérez<sup>5</sup>,  
Ciro Casanova<sup>6</sup>, Valle Velasco<sup>7</sup>, Ana Belén Llanos<sup>4</sup>, Germán  
Peces-Barba<sup>8,9</sup>, Esther Barreiro<sup>9,10,15</sup>, Ana Cañas<sup>11</sup>, Argelia  
Castaño<sup>11</sup>, María Jesús Cruz Carmona<sup>9,12</sup>, Carmen Diego<sup>13</sup>,  
Judith Garcia-Aymerich<sup>3,14,15</sup>, Cristina Martínez<sup>16</sup>, María  
Molina-Molina<sup>17</sup>, Xavier Muñoz<sup>9,12</sup>, Francisco Javier Sánchez-  
Íñigo<sup>11</sup>, Cristina Candal-Pedreira<sup>1,2</sup>

- Filiación de los autores:**
1. Área de Medicina Preventiva y Salud Pública. Universidad de Santiago de Compostela, España.
  2. Instituto de Investigación Sanitaria de Santiago de Compostela (IDIS), España.
  3. CIBER de Epidemiología y Salud Pública, CIBERESP. Madrid, España.
  4. Servicio de Neumología. Hospital Universitario de Canarias, La Laguna, Santa Cruz de Tenerife, España.
  5. Servicio de Neumología y Cirugía Torácica. Hospital Universitario Nuestra Señora de Candelaria, Santa Cruz de Tenerife, España.
  6. Servicio de Neumología/Unidad de Investigación. Hospital Universitario Nuestra Señora de Candelaria, Universidad de la Laguna, Tenerife, España.
  7. Neumología Pediátrica, Hospital Universitario de Canarias, Tenerife, España.
  8. Servicio de Neumología, Hospital Universitario Fundación Jiménez Díaz, Madrid, España.
  9. CIBER de Enfermedades Respiratorias, CIBERES. Madrid, España.
  10. Pulmonology Department-Muscle Wasting and Cachexia in Chronic Respiratory Diseases and Lung Cancer Research Group, IMIM-Hospital del Mar, Parc de Salut Mar, Department of Medicine, Universitat Autònoma de Barcelona, Parc de Recerca Biomèdica de Barcelona (PRBB), Barcelona, España.
  11. Centro Nacional de Sanidad Ambiental. Instituto de Salud Carlos III, Majadahonda, España.
  12. Servicio de Neumología. Hospital Vall d'Hebron, Barcelona, España.
  13. Servicio de Neumología. Complejo Hospitalario Universitario de Ferrol, Ferrol, España.
  14. ISGlobal, Barcelona, España.
  15. Universitat Pompeu Fabra (UPF), Barcelona, España.

16. Servicio de Neumología. Hospital Universitario Central de Asturias, Facultad de Medicina, Instituto de Investigación Sanitaria del Principado de Asturias (ISPA), Oviedo, España.
17. Unidad Funcional de Intersticio Pulmonar (UFIP), Neumología, Instituto de Investigación Biomédica de Bellvitge, Hospital Universitario de Bellvitge, L'Hospitalet de Llobregat, España.

**Dirección de  
correspondencia:**

Orlando Acosta

Servicio de Neumología

Hospital Universitario de Canarias

Carr. Gral. la Cuesta, 38320 San Cristóbal de La Laguna, Santa Cruz de Tenerife

e mail: [oacofer@gmail.com](mailto:oacofer@gmail.com)

Manuscrito: 1.254

Tablas: 2

Referencias: 13

Las erupciones volcánicas son un fenómeno natural relativamente poco frecuente y pueden tener un impacto sobre la salud de la población debido a la inhalación de gases y ceniza volcánica. Este impacto se caracteriza principalmente por la aparición de síntomas y signos respiratorios en población sana (1,2) y la agudización de síntomas en pacientes con enfermedades respiratorias previas(3,4).

El volcán situado en el Parque Natural de Cumbre Vieja, en la isla de la Palma (España), entró en erupción el 19 de septiembre de 2021 y se mantuvo activo durante 85 días. Como en otras erupciones volcánicas, la emisión de gases y cenizas a la atmósfera ha sido constante.

Con la erupción de este volcán se presenta una oportunidad única para el estudio del efecto en la salud respiratoria de un fenómeno natural de estas características debido a dos factores: la erupción ocurrió en la proximidad de núcleos urbanos cercanos al cono volcánico, lo que aumenta el número de potenciales afectados, y la mínima contaminación antropogénica (procedente de tráfico rodado o calefacciones) de la isla de la Palma reduce la posibilidad de que ésta se comporte como factor confusor.

Aunque se han realizado estudios sobre el impacto de las erupciones en diversas facetas relacionadas con la salud (1,5–8), existe un gran desconocimiento de los potenciales efectos que tendría en pacientes con enfermedades respiratorias previas (9,10) y de las posibles consecuencias respiratorias a medio-largo plazo sobre la población adulta e infantil sana (11).

Los objetivos de este estudio son valorar a corto, medio y largo plazo el efecto de la exposición a gases y ceniza volcánica procedentes de la erupción en la salud respiratoria de: población general residente en la zona afectada (adultos y niños), sujetos altamente expuestos y población diagnosticada con enfermedades respiratorias previas.

Se prevé la realización inminente del estudio multidiseño ASHES (**A**naly<sup>S</sup> of Exposure and Respiratory **H**ealth **E**ffects of Volcanic **E**ruption in the Canary Island<sup>S</sup>), patrocinado por la Sociedad Española de Neumología y Cirugía Torácica (SEPAR) y planteado por un equipo multidisciplinar de neumólogos, epidemiólogos y expertos en salud ambiental

Las características, criterios de elegibilidad y estimación de tamaño muestral de los diferentes diseños se describen en la tabla 1. Se realizará un estudio ambispectivo de cohortes para analizar el efecto de la inhalación de gases y material particulado procedente de la erupción tanto en población adulta como infantil expuesta y no expuesta y un estudio cuasi-experimental de tipo pre-post en sujetos con enfermedades respiratorias previas.

El estudio de cohortes reclutará población tanto en áreas de moderada-alta exposición (municipios de Los Llanos, Tazacorte y El Paso) como en zonas de baja exposición (municipios de Barlovento y San Andrés y Sauces).

El estudio **cuasi-experimental** reclutará pacientes con asma, enfermedad pulmonar obstructiva crónica (EPOC) y enfermedad pulmonar intersticial difusa (EPID), y comparará los últimos parámetros respiratorios y consumo de medicamentos registrados en historia clínica electrónica antes de la erupción con los parámetros obtenidos tras el período eruptivo

Se emplearán 6 fuentes de información: 1) entrevista personal; 2) muestras biológicas: sangre total/suero y orina; 3) pruebas respiratorias: pulsioximetría, espirometría forzada con broncodilatación, test de difusión y volúmenes pulmonares, prueba de óxido nítrico (FENO); 4) datos de contaminación del aire: concentración diaria y número de días en que se superaron

niveles recomendados de dióxido de nitrógeno, dióxido de azufre, ozono, partículas PM10 y PM2,5. Esta exposición será asignada a los participantes empleando los datos más cercanos a su domicilio por geolocalización; 5) información registrada en la historia clínica electrónica (sólo sujetos con enfermedades respiratorias previas): parámetros clínicos registrados en la fecha más cercana a la erupción y; 6) pruebas de imagen (sujetos con EPID o por indicación clínica).

En todos los sujetos se obtendrá información procedente de todas las fuentes mencionadas (excepto las fuentes 5 y 6, que pertenecen exclusivamente a los sujetos con enfermedad respiratoria previa). La información procedente de las distintas fuentes se recogerá en varios momentos temporales, indicados en la tabla 2.

Se establecerán dos equipos de reclutamiento que trabajarán de manera simultánea uno en la zona de exposición y otro en la zona de baja exposición. Cada equipo estará formado por dos enfermeras, bajo la coordinación del investigador principal, y contará con el material y la infraestructura necesaria para realizar las entrevistas, pruebas respiratorias y obtención de muestras biológicas. Estas últimas se almacenarán adecuadamente en un banco de muestras para su análisis posterior.

El estudio, que ha recibido la aprobación del Comité Ético para la Investigación Médica dependiente del Complejo Hospitalario Universitario de Canarias, exigirá que los participantes firmen un consentimiento informado que respetará los requisitos legales establecidos y fijará permiso de acceso a la historia clínica electrónica en caso de portar enfermedad respiratoria previa. Los padres o tutores legales autorizarán la participación de los menores de edad.

En el caso de los estudios de cohortes (en adultos y niños) se llevará a cabo un análisis de supervivencia para cada variable resultado. Se elaborarán curvas de supervivencia para cada una de las covariables utilizando el método de Kaplan-Meier, y a través del log-rank test se compararán dichas funciones para las correspondientes categorías. Se elaborarán modelos de riesgos proporcionales de Cox para cada variable resultado, ajustando por las diferentes covariables. Para el estudio cuasiexperimental se aplicarán Modelos Lineales Generalizados Mixtos (GLMM) (o lo que corresponda según la distribución de la variable resultado) que permiten analizar datos longitudinalmente (observaciones repetidas a lo largo del tiempo para cada uno de los individuos estudiados) ajustando por valores basales de la variable dependiente, lo cual presenta ventajas frente a los modelos de regresión ordinarios(12).

Esta investigación presenta limitaciones. A) No será posible analizar el efecto de la erupción en sujetos con enfermedades respiratorias poco frecuentes. B) En ciertos contextos puede ser complejo cuantificar el grado de exposición a gases y ceniza volcánica. Para afinar esta medida se tendrán en cuenta diversos factores, como la distancia al cono volcánico, la medición diaria de la calidad del aire y los hábitos personales (uso de mascarilla y permanencia en domicilio). Además, la clasificación de los sujetos incluidos en tres grupos de exposición reflejará de modo indirecto esta variable.

Sin embargo, también ofrece ventajas. A) Las peculiaridades de esta erupción, especialmente el hecho de haber sido más prolongada en el tiempo que otras recientes (2,5,8), ofrece, utilizando el diseño de cohortes propuesto (2,11,13), la valoración de los posibles efectos sobre la salud respiratoria en los diferentes subgrupos de población. B) Desde un punto de vista epidemiológico, los sujetos incluidos serán representativos de los diferentes grupos de exposición y de los enfermos respiratorios y durante el seguimiento se prevén pocas pérdidas C) Finalmente, esta investigación tendrá la potencialidad de estudiar los mecanismos moleculares que podrían estar implicados en la aparición de patología respiratoria derivada de la exposición al material eruptivo o en el agravamiento de las patologías previamente reconocidas.

Este estudio ofrece por tanto una oportunidad única para avanzar en el conocimiento de los efectos en salud de los desastres naturales en la población general, así como de los determinantes y mecanismos de empeoramiento de las enfermedades respiratorias crónicas.

## Referencias

1. Gudmundsson G. Respiratory health effects of volcanic ash with special reference to Iceland. A review. *Clin Respir J* [Internet]. 1 de enero de 2011 [citado 24 de febrero de 2022];5(1):2-9. Disponible en: <https://onlinelibrary.wiley.com/doi/full/10.1111/j.1752-699X.2010.00231.x>
2. Carlsen HK, Hauksdottir A, Valdimarsdottir UA, Gíslason T, Einarsdottir G, Runolfsson H, et al. Health effects following the Eyjafjallajökull volcanic eruption: A cohort study. *BMJ Open*. 2012;2(6):1-11.
3. Shimizu Y, Dobashi K, Hisada T, Ono A, Todokoro M, Iijima H, et al. Acute impact of volcanic ash on asthma symptoms and treatment. *Int J Immunopathol Pharmacol* [Internet]. 2007 [citado 24 de febrero de 2022];20(2 Suppl 2):9-14. Disponible en: <https://pubmed.ncbi.nlm.nih.gov/17903350/>
4. Bernstein RS, Baxter PJ, Falk H, Ing R, Foster L, Frost F. Immediate public health concerns and actions in volcanic eruptions: lessons from the Mount St. Helens eruptions, May 18-October 18, 1980. *Am J Public Health* [Internet]. 1986 [citado 28 de febrero de 2022];76(Suppl):25. Disponible en: </pmc/articles/PMC1651693/?report=abstract>
5. Baxter PJ, Ing R, Falk H, Plikaytis B. Mount St. Helens eruptions: the acute respiratory effects of volcanic ash in a North American community. *Arch Environ Health* [Internet]. 1983 [citado 24 de febrero de 2022];38(3):138-43. Disponible en: <https://pubmed.ncbi.nlm.nih.gov/6870351/>
6. Searl A, Nicholl A, Baxter PJ. Assessment of the exposure of islanders to ash from the Soufriere Hills volcano, Montserrat, British West Indies. *Occup Environ Med* [Internet]. 2002 [citado 24 de febrero de 2022];59(8):523-31. Disponible en: <https://pubmed.ncbi.nlm.nih.gov/12151608/>
7. Yano E, Maeda K, Yokoyama Y, Higashi H, Nishii S, Koizumi A. Health effects of volcanic ash: a repeat study. *Arch Environ Health* [Internet]. 1990 [citado 28 de febrero de 2022];45(6):367-73. Disponible en: <https://pubmed.ncbi.nlm.nih.gov/2270957/>
8. Oudin A, Carlsen HK, Forsberg B, Johansson C. Volcanic Ash and Daily Mortality in Sweden after the Icelandic Volcano Eruption of May 2011. *Int J Environ Res Public Health* [Internet]. 10 de diciembre de 2013 [citado 28 de febrero de 2022];10(12):6909. Disponible en: </pmc/articles/PMC3881148/>
9. Naumova EN, Yepes H, Griffiths JK, Sempértegui F, Khurana G, Jagai JS, et al. Emergency room visits for respiratory conditions in children increased after Guagua Pichincha volcanic eruptions in April 2000 in Quito, Ecuador observational study: time series analysis. *Environ Health* [Internet]. 2007 [citado 28 de febrero de 2022];6. Disponible en: <https://pubmed.ncbi.nlm.nih.gov/17650330/>
10. Forbes L, Jarvis D, Potts J, Baxter PJ. Volcanic ash and respiratory symptoms in children on the island of Montserrat, British West Indies. *Occup Environ Med* [Internet]. 1 de marzo de 2003 [citado 28 de febrero de 2022];60(3):207. Disponible en: </pmc/articles/PMC1740482/?report=abstract>

11. Hlodversdottir H, Petursdottir G, Carlsen HK, Gislason T, Hauksdottir A. Long-term health effects of the Eyjafjallajökull volcanic eruption: A prospective cohort study in 2010 and 2013. *BMJ Open*. 2016;6(9).
12. Brown H, Prescott R. *Applied Mixed Models in Medicine*. 2.<sup>a</sup> ed. Wiley; 2006.
13. Buist AS, Johnson LR, Vollmer WM, Sexton GJ, Kanarek PH. Acute effects of volcanic ash from Mount Saint Helens on lung function in children. *Am Rev Respir Dis* [Internet]. 1983 [citado 28 de febrero de 2022];127(6):714-9. Disponible en: <https://pubmed.ncbi.nlm.nih.gov/6859654/>
